# Supplementary material
Source: HighWire-hosted journal article supplement (https://cmaj.ca/highwire/filestream/150811/field_highwire_adjunct_files/5/231485-res-6-at.pdf)
Supplement: 231485-res-6-at.pdf [file 231485-res-6-at.pdf]

## Appendix 6. Interrupted time series analysis

The proportion of two-year launch at each quarter in a specific country is time series data. From the data plots, no seasonality was observed. The autocorrelation functions (ACF) and partial ACF plots, and Stoffer and Toloï test for the time series of Canada, the United States, and other countries as a whole showed no autoregressive integrated moving average (ARIMA) models were needed. We further tested the autocorrelations (Yule-Walker estimates) up to lag 4 in the regressions including time, policy uncertainty period, country (control), interactions between time and country, time and period, and time and country and period. If any of autocorrelations was significant, the autoregressive model with maximum likelihood estimation method was used for the analyses. Otherwise, ordinary least squares (OLS) models were used. We then used a bootstrapping approach with 5,000 iterations to estimate the 95% confidence interval and 90% confidence interval of the expected absolute change (predicted - counterfactual) in two-year launch proportion in Canada and the comparison countries (control), and the difference between the expected absolute changes in Canada and the comparison countries.

The Autoregressive model specification is as follows:

$$\begin{aligned} \text{Proportion}_t &= \beta_0 + \beta_1 \text{time} + \beta_2 \text{after} + \beta_3 \text{time} * \text{after} + \beta_4 \text{control} + \beta_5 \text{time} * \\ &\text{control} + \beta_6 \text{control} * \text{after} + \beta_7 \text{time} * \text{control} * \text{after} + v_t; \\ v_t &= -\varphi_1 v_{t-1} - \varphi_2 v_{t-2} - \dots - \varphi_m v_{t-m} + \varepsilon_t; \end{aligned}$$

where  $\varepsilon_t$  is normally and independently distributed with mean 0 and variance  $\sigma^2$ ;

*time* - time in quarters

*after* - uncertain period indicator: = 0 before uncertain period, = 1 in uncertain period

*control*- control indicator: = 0 Canada, = 1 the United States or Other counties as a whole.

The model is an OLS model when  $\varphi = 0$ .

In this model,

$\beta_0$ : the launch proportion in Canada at time zero (Q1-2012);

$\beta_1$ : the proportion trend in Canada before uncertain period (before interruption);

$\beta_2$ : the proportion level change in Canada in uncertain period (after interruption).

$\beta_3$ : the proportion trend change in Canada in uncertain period

$\beta_4$ : the level difference between the control country and Canada at time zero

$\beta_5$ : the trend difference between the control country and Canada before uncertain period

$\beta_6$ : the difference in the level change (after – before) between the control country and Canada

$\beta_7$ : the difference in the trend change (after – before) between the control country and Canada

The significances of  $\beta_6$  and  $\beta_7$  imply that the impact of the proposed policy change and uncertainty in Canada is significantly different from the control countries.

The regression coefficients  $\beta$  and the autoregressive error model parameters  $\varphi_i$  were estimated simultaneously. SAS AUTOREG procedure was used for the analysis.

**Table S2. Autoregressive model (†) or OLS estimates in the interrupted time series analysis of two-year launch in uncertain policy period after 2017 and before uncertain policy period in 2012-2017**

| Variable                                         | Interpretation                                                                       | Estimate | SE    | P value |
|--------------------------------------------------|--------------------------------------------------------------------------------------|----------|-------|---------|
| <b>After 2017 as the uncertain policy period</b> |                                                                                      |          |       |         |
| <b>Compared to US†</b>                           |                                                                                      |          |       |         |
| Intercept                                        | Launch proportion of Canada at time zero                                             | 0.482    | 0.041 | <0.001  |
| time                                             | Trend before uncertain period                                                        | -0.002   | 0.003 | 0.6     |
| after                                            | Level change in uncertain period in Canada                                           | -0.131   | 0.389 | 0.7     |
| time*after                                       | Slope/trend change in uncertain period in Canada                                     | 0.001    | 0.014 | 0.9     |
| control                                          | Difference in launch proportion at time zero in US compared to Canada                | 0.302    | 0.057 | <0.001  |
| time*control                                     | Slope/trend difference in US compared to Canada before uncertain period              | 0.005    | 0.004 | 0.3     |
| control*after                                    | Difference in level change between US and Canada                                     | -0.059   | 0.553 | 0.9     |
| time*control*after                               | Difference in slope/trend change between US and Canada                               | 0.004    | 0.020 | 0.8     |
| AR(1)                                            | Autoregressive parameter for lag 1                                                   | 0.289    | 0.127 | 0.03    |
| <b>Compared to Other Countries</b>               |                                                                                      |          |       |         |
| Intercept                                        | Launch proportion of Canada at time zero                                             | 0.489    | 0.055 | <0.001  |
| time                                             | Trend before uncertain period                                                        | -0.002   | 0.004 | 0.6     |
| after                                            | Level change in uncertain period in Canada                                           | 0.064    | 0.509 | 0.9     |
| time*after                                       | Slope/trend change in uncertain period in Canada                                     | -0.006   | 0.018 | 0.8     |
| control                                          | Difference in launch proportion at time zero in other countries compared to Canada   | 0.419    | 0.078 | <0.001  |
| time*control                                     | Slope/trend difference in other countries compared to Canada before uncertain period | -0.002   | 0.006 | 0.7     |
| control*after                                    | Difference in level change between other countries and Canada                        | 1.037    | 0.719 | 0.2     |
| time*control*after                               | Difference in slope/trend change between other countries and Canada                  | -0.036   | 0.026 | 0.2     |
| <b>After 2015 as the uncertain policy period</b> |                                                                                      |          |       |         |
| <b>Compared to US</b>                            |                                                                                      |          |       |         |
| Intercept                                        | Launch proportion of Canada at time zero                                             | 0.524    | 0.063 | <0.001  |
| time                                             | Trend before uncertain period                                                        | -0.008   | 0.007 | 0.3     |
| after                                            | Level change in uncertain period in Canada                                           | 0.177    | 0.173 | 0.3     |
| time*after                                       | Slope/trend change in uncertain period in Canada                                     | -0.005   | 0.010 | 0.6     |
| control                                          | Difference in launch proportion at time zero in US compared to Canada                | 0.303    | 0.090 | 0.001   |

|                                                |                                                                                      |        |       |        |
|------------------------------------------------|--------------------------------------------------------------------------------------|--------|-------|--------|
| time*control                                   | Slope/trend difference in US compared to Canada before uncertain period              | 0.006  | 0.010 | 0.6    |
| control*after                                  | Difference in level change between US and Canada                                     | -0.234 | 0.245 | 0.3    |
| time*control*after                             | Difference in slope/trend change between US and Canada                               | 0.010  | 0.014 | 0.5    |
| <b>Compared to Other Countries<sup>†</sup></b> |                                                                                      |        |       |        |
| Intercept                                      | Launch proportion of Canada at time zero                                             | 0.503  | 0.037 | <0.001 |
| time                                           | Trend before uncertain period                                                        | -0.006 | 0.004 | 0.2    |
| after                                          | Level change in uncertain period in Canada                                           | 0.154  | 0.097 | 0.1    |
| time*after                                     | Slope/trend change in uncertain period in Canada                                     | -0.005 | 0.005 | 0.4    |
| control                                        | Difference in launch proportion at time zero in other countries compared to Canada   | 0.320  | 0.051 | <0.001 |
| time*control                                   | Slope/trend difference in other countries compared to Canada before uncertain period | 0.013  | 0.006 | 0.03   |
| control*after                                  | Difference in level change between other countries and Canada                        | 0.192  | 0.139 | 0.2    |
| time*control*after                             | Difference in slope/trend change between other countries and Canada                  | -0.020 | 0.008 | 0.01   |
| AR(1)                                          | Autoregressive parameter for lag 1                                                   | 0.330  | 0.129 | 0.01   |
| AR(2)                                          | Autoregressive parameter for lag 2                                                   | 0.288  | 0.130 | 0.03   |
| AR(3)                                          | Autoregressive parameter for lag 3                                                   | 0.332  | 0.130 | 0.01   |

**Table S3. Expected absolute change in two-year launch proportion and the difference in the expected absolute changes between Canada and comparison countries based on the controlled interrupted time series analysis**

| <b>Comparison country</b>                                                                                                                                                          | <b>Uncertain policy period</b>            | <b>Expected absolute change in Canada (predicted - counterfactual) (95% CI)</b> | <b>Expected absolute change in comparison country (predicted - counterfactual) (95% CI)</b> | <b>Difference between expected absolute changes (Canada - comparison country) (95% CI)</b> |
|------------------------------------------------------------------------------------------------------------------------------------------------------------------------------------|-------------------------------------------|---------------------------------------------------------------------------------|---------------------------------------------------------------------------------------------|--------------------------------------------------------------------------------------------|
| US                                                                                                                                                                                 | After 2017 as the uncertain policy period | -0.097 (-0.29, 0.10)                                                            | -0.031 (-0.14, 0.10)                                                                        | -0.066 (-0.30, 0.15)                                                                       |
| OTHERS                                                                                                                                                                             | After 2017 as the uncertain policy period | -0.097 (-0.29, 0.10)                                                            | -0.069 (-0.21, 0.06)                                                                        | -0.028 (-0.25, 0.21)                                                                       |
| US                                                                                                                                                                                 | After 2015 as the uncertain policy period | 0.063 (-0.24, 0.34)                                                             | 0.066 (-0.14, 0.27)                                                                         | -0.003 (-0.36, 0.35)                                                                       |
| OTHERS                                                                                                                                                                             | After 2015 as the uncertain policy period | 0.037 (-0.24, 0.34)                                                             | -0.244 (-0.36, -0.05)                                                                       | 0.281 (-0.07, 0.60)                                                                        |
| <i>Predicted and counterfactual proportions capped at 1</i>                                                                                                                        |                                           |                                                                                 |                                                                                             |                                                                                            |
| US                                                                                                                                                                                 | After 2015 as the uncertain policy period | 0.063 (-0.24, 0.34)                                                             | 0.066 (-0.13, 0.27)                                                                         | -0.003 (-0.36, 0.34)                                                                       |
| OTHERS                                                                                                                                                                             | After 2015 as the uncertain policy period | 0.037 (-0.24, 0.34)                                                             | -0.228 (-0.28, -0.05)                                                                       | 0.265 (-0.08, 0.57)                                                                        |
| Average estimates in the uncertain policy period; the 95% CI were estimated using bootstrapping approach with 5,000 iterations<br>CI: confidence interval<br>US: the United States |                                           |                                                                                 |                                                                                             |                                                                                            |

| <b>Comparison country</b> | <b>Uncertain policy period</b>            | <b>Expected absolute change in Canada (predicted - counterfactual) (90% CI)</b> | <b>Expected absolute change in comparison country (predicted - counterfactual) (90% CI)</b> | <b>Difference between expected absolute changes (Canada - comparison country) (90% CI)</b> |
|---------------------------|-------------------------------------------|---------------------------------------------------------------------------------|---------------------------------------------------------------------------------------------|--------------------------------------------------------------------------------------------|
| US                        | After 2017 as the uncertain policy period | -0.097 (-0.26, 0.07)                                                            | -0.031 (-0.12, 0.08)                                                                        | -0.066 (-0.27, 0.12)                                                                       |
| OTHERS                    | After 2017 as the uncertain policy period | -0.097 (-0.26, 0.07)                                                            | -0.069 (-0.19, 0.03)                                                                        | -0.028 (-0.22, 0.17)                                                                       |
| US                        | After 2015 as the uncertain policy period | 0.063 (-0.19, 0.30)                                                             | 0.066 (-0.11, 0.23)                                                                         | -0.003 (-0.30, 0.29)                                                                       |
| OTHERS                    | After 2015 as the uncertain policy period | 0.037 (-0.19, 0.30)                                                             | -0.244 (-0.34, -0.08)                                                                       | 0.281 (-0.02, 0.54)                                                                        |

| <i>Predicted and counterfactual proportions capped at 1</i>                                                                                                                        |                                           |                     |                       |                     |
|------------------------------------------------------------------------------------------------------------------------------------------------------------------------------------|-------------------------------------------|---------------------|-----------------------|---------------------|
| OTHERS                                                                                                                                                                             | After 2015 as the uncertain policy period | 0.037 (-0.19, 0.30) | -0.228 (-0.26, -0.08) | 0.265 (-0.02, 0.51) |
| Average estimates in the uncertain policy period; the 90% CI were estimated using bootstrapping approach with 5,000 iterations<br>CI: confidence interval<br>US: the United States |                                           |                     |                       |                     |

**Table S4. The impact of uncertain policy period on the log odds of two-year launching in specific countries compared to Canada**

| Parameter                                     | US                 | Other Countries    | Australia          | Belgium            | France             | Germany            | Italy              | Japan              | Netherlands        | Norway            | Spain             | Sweden             | Switzerland        | UK                 |
|-----------------------------------------------|--------------------|--------------------|--------------------|--------------------|--------------------|--------------------|--------------------|--------------------|--------------------|-------------------|-------------------|--------------------|--------------------|--------------------|
| Intercept                                     | -0.79<br>(0.37)**  | -0.41<br>(0.32)    | -0.74<br>(0.40)*   | -0.90<br>(0.36)**  | -0.49<br>(0.34)    | -0.61<br>(0.33)*   | -1.07<br>(0.34)*** | -0.43<br>(0.27)    | -1.07<br>(0.33)*** | -0.74<br>(0.35)** | -0.81<br>(0.34)** | -0.51<br>(0.34)    | -0.50 (0.37)       | -0.50<br>(0.33)    |
| Period                                        |                    |                    |                    |                    |                    |                    |                    |                    |                    |                   |                   |                    |                    |                    |
| after 2017                                    | -0.59<br>(0.30)*   | -0.48<br>(0.26)*   | -0.54<br>(0.31)*   | -0.50<br>(0.28)*   | -0.58<br>(0.27)**  | -0.52<br>(0.27)*   | -0.48<br>(0.27)*   | -0.52<br>(0.25)**  | -0.46 (0.28)       | -0.58<br>(0.27)** | -0.52<br>(0.27)*  | -0.59<br>(0.28)**  | -0.59<br>(0.29)**  | -0.55<br>(0.27)**  |
| 2012-2017                                     | Ref                | Ref                | Ref                | Ref                | Ref                | Ref                | Ref                | Ref                | Ref                | Ref               | Ref               | Ref                | Ref                | Ref                |
| Country                                       |                    |                    |                    |                    |                    |                    |                    |                    |                    |                   |                   |                    |                    |                    |
| The specific country                          | 2.29<br>(0.22)***  | 2.21<br>(0.23)***  | -0.74<br>(0.17)*** | -0.49<br>(0.16)*** | -0.41<br>(0.16)**  | 0.96<br>(0.17)***  | -0.02<br>(0.16)    | -0.06<br>(0.19)    | -0.85<br>(0.19)*** | 0.31<br>(0.14)**  | -0.37<br>(0.16)** | 0.63<br>(0.15)***  | -0.02 (0.15)       | 0.80<br>(0.16)***  |
| Canada                                        | Ref                | Ref                | Ref                | Ref                | Ref                | Ref                | Ref                | Ref                | Ref                | Ref               | Ref               | Ref                | Ref                | Ref                |
| Country*Period                                |                    |                    |                    |                    |                    |                    |                    |                    |                    |                   |                   |                    |                    |                    |
| Country*after 2017                            | 0.75<br>(0.42)*    | -0.28<br>(0.36)    | -0.16<br>(0.37)    | -0.52<br>(0.36)    | 0.56<br>(0.33)*    | 0.16<br>(0.30)     | 0.02<br>(0.32)     | 0.42<br>(0.34)     | -0.68<br>(0.40)*   | -0.69<br>(0.31)** | -0.38<br>(0.35)   | -0.63<br>(0.29)**  | -0.32 (0.31)       | 0.02<br>(0.31)     |
| Country*2012-2017                             | Ref                | Ref                | Ref                | Ref                | Ref                | Ref                | Ref                | Ref                | Ref                | Ref               | Ref               | Ref                | Ref                | Ref                |
| ATC classification                            |                    |                    |                    |                    |                    |                    |                    |                    |                    |                   |                   |                    |                    |                    |
| B: Blood and blood forming organs             | -0.86<br>(0.40)**  | -1.24<br>(0.43)*** | -2.18<br>(0.63)*** | -1.15<br>(0.60)*   | -1.32<br>(0.45)*** | -1.17<br>(0.44)*** | -1.09<br>(0.45)**  | -0.40<br>(0.37)    | -0.22 (0.51)       | -1.09<br>(0.54)** | -0.98<br>(0.52)*  | -0.93<br>(0.48)*   | -1.59<br>(0.47)*** | -1.70<br>(0.46)*** |
| J: Antiinfectives for systemic use            | -0.20<br>(0.35)    | 0.08<br>(0.31)     | 0.40<br>(0.33)     | 0.40<br>(0.33)     | 0.05<br>(0.31)     | -0.09<br>(0.31)    | 0.48<br>(0.30)     | 0.14<br>(0.27)     | 1.01<br>(0.33)***  | 0.20<br>(0.32)    | 0.41<br>(0.30)    | -0.03<br>(0.33)    | -0.23 (0.34)       | -0.04<br>(0.31)    |
| N: Nervous system                             | -1.09<br>(0.40)*** | -1.45<br>(0.45)*** | -1.05<br>(0.49)**  | -1.41<br>(0.44)*** | -1.44<br>(0.43)*** | -1.13<br>(0.44)**  | -0.94<br>(0.43)**  | -1.39<br>(0.36)*** | -0.55 (0.49)       | -0.92<br>(0.47)** | -0.61<br>(0.47)   | -1.42<br>(0.50)*** | -1.38<br>(0.49)*** | -1.21<br>(0.44)*** |
| Other ATC                                     | -0.90<br>(0.28)*** | -0.50<br>(0.26)*   | -0.54<br>(0.27)*   | -0.45<br>(0.27)*   | -0.98<br>(0.25)*** | -0.69<br>(0.25)*** | -0.44<br>(0.25)*   | -0.33<br>(0.21)    | 0.27 (0.24)        | -0.57<br>(0.26)** | -0.39<br>(0.25)   | -0.81<br>(0.26)*** | -0.81<br>(0.27)*** | -0.85<br>(0.26)*** |
| L: Antineoplastic and immunomodulating agents | Ref                | Ref                | Ref                | Ref                | Ref                | Ref                | Ref                | Ref                | Ref                | Ref               | Ref               | Ref                | Ref                | Ref                |
| Number of comparators in Canada               |                    |                    |                    |                    |                    |                    |                    |                    |                    |                   |                   |                    |                    |                    |
| 0                                             | -0.35<br>(0.34)    | 0.09<br>(0.35)     | 0.02<br>(0.37)     | -0.20<br>(0.39)    | 0.04<br>(0.35)     | 0.17<br>(0.33)     | 0.11<br>(0.35)     | -0.18<br>(0.29)    | -0.43 (0.32)       | -0.01<br>(0.34)   | -0.12<br>(0.37)   | -0.18<br>(0.35)    | -0.17 (0.38)       | -0.04<br>(0.34)    |
| 1-4                                           | -0.37<br>(0.26)    | -0.46<br>(0.24)*   | -0.66<br>(0.27)**  | -0.32<br>(0.25)    | -0.16<br>(0.24)    | -0.36<br>(0.25)    | -0.01<br>(0.24)    | -0.23<br>(0.20)    | -0.53<br>(0.24)**  | -0.19<br>(0.25)   | -0.37<br>(0.24)   | -0.37<br>(0.25)    | -0.32 (0.26)       | -0.30<br>(0.25)    |
| >4                                            | Ref                | Ref                | Ref                | Ref                | Ref                | Ref                | Ref                | Ref                | Ref                | Ref               | Ref               | Ref                | Ref                | Ref                |
| High price (top 10%)                          | 0.06<br>(0.23)     | -0.01<br>(0.24)    | -0.09<br>(0.26)    | 0.11<br>(0.25)     | -0.04<br>(0.26)    | 0.35<br>(0.24)     | 0.33<br>(0.24)     | -0.14<br>(0.21)    | -0.20 (0.22)       | -0.17<br>(0.24)   | 0.22<br>(0.24)    | -0.04<br>(0.25)    | -0.19 (0.25)       | 0.09<br>(0.25)     |
| First year sales in US                        |                    |                    |                    |                    |                    |                    |                    |                    |                    |                   |                   |                    |                    |                    |
| > 20M                                         | 2.19<br>(0.24)***  | 1.42<br>(0.22)***  | 2.09<br>(0.25)***  | 1.88<br>(0.25)***  | 1.55<br>(0.22)***  | 1.57<br>(0.21)***  | 1.63<br>(0.22)***  | 1.09<br>(0.18)***  | 1.79<br>(0.25)***  | 1.71<br>(0.23)*** | 1.60<br>(0.23)*** | 1.73<br>(0.22)***  | 1.82<br>(0.23)***  | 1.62<br>(0.21)***  |

|                                                                                                                                                                                                                                                                                                                                                           |     |     |     |     |     |     |     |     |     |     |     |     |     |     |
|-----------------------------------------------------------------------------------------------------------------------------------------------------------------------------------------------------------------------------------------------------------------------------------------------------------------------------------------------------------|-----|-----|-----|-----|-----|-----|-----|-----|-----|-----|-----|-----|-----|-----|
| ≤ 20M                                                                                                                                                                                                                                                                                                                                                     | Ref | Ref | Ref | Ref | Ref | Ref | Ref | Ref | Ref | Ref | Ref | Ref | Ref | Ref |
| Coefficients and standard errors estimated from the generalized estimating equation logistic regression corresponding to each specific country compared to Canada; *:0.05 ≤ p-value < 0.1, **:0.01 ≤ p-value < 0.05, ***: p-value < 0.01<br>ATC: Anatomical Therapeutic Chemical; UK: the United Kingdom; US: the United States; Ref: the reference group |     |     |     |     |     |     |     |     |     |     |     |     |     |     |

**Table S5. The impact of uncertain policy period on log odds of two-year launching in the United States and other countries compared to Canada in ATC sub-groups**

| Parameter                                              | Main Analysis: After 2017 as the uncertain policy period |         |                  |         | Sensitivity Analysis: After 2015 as the uncertain policy period |         |                  |         |
|--------------------------------------------------------|----------------------------------------------------------|---------|------------------|---------|-----------------------------------------------------------------|---------|------------------|---------|
|                                                        | US                                                       |         | Other Countries  |         | US                                                              |         | Other Countries  |         |
|                                                        | Coefficient (SE)                                         | P value | Coefficient (SE) | P value | Coefficient (SE)                                                | P value | Coefficient (SE) | P value |
| <b>ATC: Blood and blood forming organs</b>             |                                                          |         |                  |         |                                                                 |         |                  |         |
| Period: Uncertain policy period                        | N/A                                                      |         | 2.14 (1.37)      | 0.1     | N/A                                                             |         | N/A              |         |
| Country                                                | N/A                                                      |         | 5.51 (1.56)***   | <0.001  | N/A                                                             |         | N/A              |         |
| Country*Uncertain policy period                        | N/A                                                      |         | -1.87 (1.84)     | 0.3     | N/A                                                             |         | N/A              |         |
| <b>ATC: Anti-infectives for systemic use</b>           |                                                          |         |                  |         |                                                                 |         |                  |         |
| Period: Uncertain policy period                        | -0.18 (1.07)                                             | 0.9     | 0.11 (0.87)      | 0.9     | 0.21 (0.87)                                                     | 0.8     | 0.09 (0.79)      | 0.9     |
| Country                                                | 2.09 (0.52)***                                           | <0.001  | 4.13 (0.86)***   | <0.001  | 2.56 (0.79)***                                                  | 0.001   | 4.42 (1.16)***   | <0.001  |
| Country*Uncertain policy period                        | 1.75 (1.27)                                              | 0.2     | -1.70 (1.18)     | 0.1     | 0.06 (1.05)                                                     | 1.0     | -1.63 (1.35)     | 0.2     |
| <b>ATC: Antineoplastic and immunomodulating agents</b> |                                                          |         |                  |         |                                                                 |         |                  |         |
| Period: Uncertain policy period                        | -0.52 (0.43)                                             | 0.2     | -0.54 (0.44)     | 0.2     | -0.35 (0.44)                                                    | 0.4     | -0.33 (0.45)     | 0.5     |
| Country                                                | 2.09 (0.46)***                                           | <0.001  | 1.64 (0.37)***   | <0.001  | 2.01 (0.55)***                                                  | <0.001  | 2.03 (0.55)***   | <0.001  |
| Country*Uncertain policy period                        | -0.03 (0.71)                                             | 1.0     | -0.51 (0.55)     | 0.4     | 0.10 (0.70)                                                     | 0.9     | -0.92 (0.63)     | 0.1     |
| <b>ATC: nervous system</b>                             |                                                          |         |                  |         |                                                                 |         |                  |         |
| Period: Uncertain policy period                        | -0.96 (1.14)                                             | 0.4     | -0.94 (1.02)     | 0.4     | -1.64 (1.26)                                                    | 0.2     | -1.23 (1.01)     | 0.2     |
| Country                                                | 3.06 (1.24)**                                            | 0.01    | 1.21 (0.70)*     | 0.09    | 2.41 (1.37)*                                                    | 0.08    | 1.07 (1.05)      | 0.3     |
| Country*Uncertain policy period                        | 2.16 (1.64)                                              | 0.2     | 0.89 (1.06)      | 0.4     | 2.38 (1.41)*                                                    | 0.09    | 0.82 (1.22)      | 0.5     |
| <b>Other ATC</b>                                       |                                                          |         |                  |         |                                                                 |         |                  |         |
| Period: Uncertain policy period                        | -0.93 (0.58)                                             | 0.1     | -0.76 (0.47)     | 0.1     | -0.43 (0.46)                                                    | 0.4     | -0.23 (0.36)     | 0.5     |
| Country                                                | 2.54 (0.42)***                                           | <0.001  | 2.38 (0.36)***   | <0.001  | 2.42 (0.48)***                                                  | <0.001  | 2.58 (0.39)***   | <0.001  |
| Country*Uncertain policy period                        | 0.69 (0.73)                                              | 0.3     | 0.62 (0.79)      | 0.4     | 0.56 (0.58)                                                     | 0.3     | -0.17 (0.60)     | 0.8     |

Coefficients (standard error) estimated from generalized estimating equation logistic regression adjusted for number of comparators in Canada, high price, and first year sales in the US; N/A: regressions could not be estimated due to small samples and sparseness; US: the United States; ATC: WHO Anatomic Therapeutic Chemical; \*:0.05 ≤ p-value < 0.1, \*\*:0.01 ≤ p-value < 0.05, \*\*\*: p-value < 0.01.



**Table S6. The impact of uncertain policy period on log odds of two-year launching in the United States and other countries compared to Canada in sub-groups of number of comparators in Canada**

| Parameter                                                                                                                                                                                                                                                                                                             | Main Analysis: After 2017 as the uncertain policy period |         |                  |         | Sensitivity Analysis: After 2015 as the uncertain policy period |         |                  |         |
|-----------------------------------------------------------------------------------------------------------------------------------------------------------------------------------------------------------------------------------------------------------------------------------------------------------------------|----------------------------------------------------------|---------|------------------|---------|-----------------------------------------------------------------|---------|------------------|---------|
|                                                                                                                                                                                                                                                                                                                       | US                                                       |         | Other Countries  |         | US                                                              |         | Other Countries  |         |
|                                                                                                                                                                                                                                                                                                                       | Coefficient (SE)                                         | P value | Coefficient (SE) | P value | Coefficient (SE)                                                | P value | Coefficient (SE) | P value |
| <b>Number of comparators: 0</b>                                                                                                                                                                                                                                                                                       |                                                          |         |                  |         |                                                                 |         |                  |         |
| Period: Uncertain policy period                                                                                                                                                                                                                                                                                       | 0.24 (0.82)                                              | 0.8     | -0.24 (0.73)     | 0.7     | -0.23 (0.73)                                                    | 0.8     | -0.79 (0.68)     | 0.2     |
| Country                                                                                                                                                                                                                                                                                                               | 3.75 (0.75)***                                           | <0.001  | 3.72 (0.82)***   | <0.001  | 3.63 (0.83)***                                                  | <0.001  | 3.27 (0.83)***   | <0.001  |
| Country*Uncertain policy period                                                                                                                                                                                                                                                                                       | -1.57 (1.29)                                             | 0.2     | -0.77 (1.30)     | 0.6     | -1.05 (1.21)                                                    | 0.4     | 0.30 (1.25)      | 0.8     |
| <b>Number of comparators: 1-4</b>                                                                                                                                                                                                                                                                                     |                                                          |         |                  |         |                                                                 |         |                  |         |
| Period: Uncertain policy period                                                                                                                                                                                                                                                                                       | -0.44 (0.39)                                             | 0.3     | -0.29 (0.33)     | 0.4     | -0.31 (0.35)                                                    | 0.4     | -0.19 (0.29)     | 0.5     |
| Country                                                                                                                                                                                                                                                                                                               | 2.33 (0.30)***                                           | <0.001  | 1.98 (0.27)***   | <0.001  | 2.16 (0.35)***                                                  | <0.001  | 2.34 (0.34)***   | <0.001  |
| Country*Uncertain policy period                                                                                                                                                                                                                                                                                       | 0.81 (0.51)                                              | 0.1     | 0.08 (0.47)      | 0.9     | 0.83 (0.46)*                                                    | 0.07    | -0.59 (0.44)     | 0.2     |
| <b>Number of comparators: &gt;4</b>                                                                                                                                                                                                                                                                                   |                                                          |         |                  |         |                                                                 |         |                  |         |
| Period: Uncertain policy period                                                                                                                                                                                                                                                                                       | -0.85 (0.56)                                             | 0.1     | -0.95 (0.48)**   | 0.047   | -0.11 (0.53)                                                    | 0.8     | -0.02 (0.48)     | 1.0     |
| Country                                                                                                                                                                                                                                                                                                               | 1.88 (0.39)***                                           | <0.001  | 2.99 (0.68)***   | <0.001  | 2.10 (0.55)***                                                  | <0.001  | 2.64 (0.63)***   | <0.001  |
| Country*Uncertain policy period                                                                                                                                                                                                                                                                                       | 1.64 (0.88)*                                             | 0.06    | -1.33 (0.81)     | 0.1     | 0.52 (0.73)                                                     | 0.5     | -0.68 (0.75)     | 0.4     |
| Coefficients (standard error) estimated from generalized estimating equation logistic regression adjusted for the 1 <sup>st</sup> level of Anatomical Therapeutic Chemical, high price, and first year sales in the US; US: the United States; *:0.05 ≤ p-value < 0.1, **:0.01 ≤ p-value < 0.05, ***: p-value < 0.01. |                                                          |         |                  |         |                                                                 |         |                  |         |

**Table S7. The impact of uncertain policy period on log odds of two-year launching in the United States and other countries compared to Canada in sub-groups of high price and subgroups of first-year sales in the United States**

| Parameter                               | Main Analysis: After 2017 as the uncertain policy period |         |                  |         | Sensitivity Analysis: After 2015 as the uncertain policy period |         |                  |         |
|-----------------------------------------|----------------------------------------------------------|---------|------------------|---------|-----------------------------------------------------------------|---------|------------------|---------|
|                                         | US                                                       |         | Other Countries  |         | US                                                              |         | Other Countries  |         |
|                                         | Coefficient (SE)                                         | P value | Coefficient (SE) | P value | Coefficient (SE)                                                | P value | Coefficient (SE) | P value |
| <b>High price in the top 10%</b>        |                                                          |         |                  |         |                                                                 |         |                  |         |
| Period: Uncertain policy period         | -0.55 (0.80)                                             | 0.5     | -0.03 (0.56)     | 0.9     | -0.08 (0.53)                                                    | 0.9     | 0.15 (0.48)      | 0.8     |
| Country                                 | 3.05 (0.56)***                                           | <0.001  | 2.66 (0.47)***   | <0.001  | 2.98 (0.69)***                                                  | <0.001  | 2.61 (0.60)***   | <0.001  |
| Country*Uncertain policy period         | 1.56 (1.62)                                              | 0.3     | -0.00 (0.94)     | 1.0     | 0.78 (0.98)                                                     | 0.4     | 0.10 (0.80)      | 0.9     |
| <b>Price not in the top 10%</b>         |                                                          |         |                  |         |                                                                 |         |                  |         |
| Period: Uncertain policy period         | -0.62 (0.34)*                                            | 0.07    | -0.56 (0.29)*    | 0.05    | -0.40 (0.33)                                                    | 0.2     | -0.33 (0.27)     | 0.2     |
| Country                                 | 2.08 (0.24)***                                           | <0.001  | 2.11 (0.26)***   | <0.001  | 2.10 (0.30)***                                                  | <0.001  | 2.47 (0.33)***   | <0.001  |
| Country*Uncertain policy period         | 0.84 (0.44)*                                             | 0.05    | -0.32 (0.41)     | 0.4     | 0.47 (0.40)                                                     | 0.2     | -0.81 (0.40)**   | 0.045   |
| <b>First-year sales in US &gt;\$20M</b> |                                                          |         |                  |         |                                                                 |         |                  |         |
| Period: Uncertain policy period         | -0.68 (0.36)*                                            | 0.06    | -0.62 (0.37)*    | 0.09    | 0.03 (0.33)                                                     | 0.9     | 0.07 (0.33)      | 0.8     |
| Country                                 | 2.97 (0.55)***                                           | <0.001  | 1.44 (0.27)***   | <0.001  | 3.05 (0.62)***                                                  | <0.001  | 1.97 (0.37)***   | <0.001  |
| Country*Uncertain policy period         | 0.46 (0.93)                                              | 0.6     | -0.22 (0.46)     | 0.6     | 0.13 (0.88)                                                     | 0.9     | -1.07 (0.45)**   | 0.02    |
| <b>First-year sales in US ≤\$20M</b>    |                                                          |         |                  |         |                                                                 |         |                  |         |
| Period: Uncertain policy period         | -0.37 (0.47)                                             | 0.4     | -0.17 (0.45)     | 0.7     | -0.91 (0.45)**                                                  | 0.045   | -0.77 (0.43)*    | 0.08    |
| Country                                 | 2.19 (0.32)***                                           | <0.001  | 3.03 (0.34)***   | <0.001  | 1.86 (0.36)***                                                  | <0.001  | 2.86 (0.40)***   | <0.001  |
| Country*Uncertain policy period         | 0.56 (0.57)                                              | 0.3     | -0.47 (0.55)     | 0.4     | 1.00 (0.52)*                                                    | 0.05    | 0.09 (0.54)      | 0.9     |

Coefficients (standard error) estimated from generalized estimating equation logistic regression adjusted for the 1<sup>st</sup> level of Anatomical Therapeutic Chemical, number of comparators in Canada, and high price or first year sales in the US; US: the United States; \*:0.05 ≤ p-value < 0.1, \*\*:0.01 ≤ p-value < 0.05, \*\*\*: p-value < 0.01.

**Table S8. The impact of uncertain policy period on log odds of two-year launching in the United States and other countries compared to Canada in sub-groups of therapeutic benefit**

| Parameter                                                | Main Analysis: After 2017 as the uncertain policy period |         |                  |         | Sensitivity Analysis: After 2015 as the uncertain policy period |         |                  |         |
|----------------------------------------------------------|----------------------------------------------------------|---------|------------------|---------|-----------------------------------------------------------------|---------|------------------|---------|
|                                                          | US                                                       |         | Other Countries  |         | US                                                              |         | Other Countries  |         |
|                                                          | Coefficient (SE)                                         | P value | Coefficient (SE) | P value | Coefficient (SE)                                                | P value | Coefficient (SE) | P value |
| <b>Major</b>                                             |                                                          |         |                  |         |                                                                 |         |                  |         |
| Period: Uncertain policy period                          | N/A                                                      |         | 0.32 (0.70)      | 0.6     | -0.41 (1.20)                                                    | 0.7     | N/A              |         |
| Country                                                  | N/A                                                      |         | 3.04 (0.96)**    | 0.002   | 2.71 (1.52)*                                                    | 0.07    | N/A              |         |
| Country*Uncertain policy period                          | N/A                                                      |         | -0.88 (1.24)     | 0.5     | 3.79 (1.66)**                                                   | 0.02    | N/A              |         |
| <b>Moderate</b>                                          |                                                          |         |                  |         |                                                                 |         |                  |         |
| Period: Uncertain policy period                          | N/A                                                      |         | N/A              |         | N/A                                                             |         | N/A              |         |
| Country                                                  | N/A                                                      |         | N/A              |         | N/A                                                             |         | N/A              |         |
| Country*Uncertain policy period                          | N/A                                                      |         | N/A              |         | N/A                                                             |         | N/A              |         |
| <b>Little to No</b>                                      |                                                          |         |                  |         |                                                                 |         |                  |         |
| Period: Uncertain policy period                          | N/A                                                      |         | -0.22 (0.41)     | 0.6     | -0.13 (0.38)                                                    | 0.7     | -0.12 (0.37)     | 0.7     |
| Country                                                  | N/A                                                      |         | 2.30 (0.40)***   | <0.001  | 2.20 (0.46)***                                                  | <0.001  | 2.18 (0.45)***   | <0.001  |
| Country*Uncertain policy period                          | N/A                                                      |         | -0.48 (0.70)     | 0.5     | 1.17 (0.73)                                                     | 0.1     | -0.09 (0.65)     | 0.9     |
| <b>Missing rating</b>                                    |                                                          |         |                  |         |                                                                 |         |                  |         |
| Period: Uncertain policy period                          | N/A                                                      |         | N/A              |         | 0.75 (1.15)                                                     | 0.5     | -0.45 (1.13)     | 0.7     |
| Country                                                  | N/A                                                      |         | N/A              |         | 5.38 (1.11)***                                                  | <0.001  | 4.13 (0.87)***   | <0.001  |
| Country*Uncertain policy period                          | N/A                                                      |         | N/A              |         | -0.42 (1.19)                                                    | 0.7     | -0.51 (1.17)     | 0.7     |
| <b>Sensitivity Analysis: Imputed therapeutic ratings</b> |                                                          |         |                  |         |                                                                 |         |                  |         |
| <b>Major</b>                                             |                                                          |         |                  |         |                                                                 |         |                  |         |
| Period: Uncertain policy period                          | 0.46 (0.81)                                              | 0.6     | 0.80 (0.64)      | 0.2     | 0.67 (0.95)                                                     | 0.5     | 1.38 (0.89)      | 0.1     |
| Country                                                  | 4.58 (1.31)***                                           | <0.001  | 2.70 (0.65)***   | <0.001  | 4.38 (1.91)**                                                   | 0.02    | 3.27 (0.98)***   | <0.001  |
| Country*Uncertain policy period                          | 1.50 (1.58)                                              | 0.3     | -0.39 (0.89)     | 0.7     | 0.84 (1.76)                                                     | 0.6     | -1.03 (1.03)     | 0.3     |
| <b>Moderate</b>                                          |                                                          |         |                  |         |                                                                 |         |                  |         |

|                                                                                                                                                                                                                                                                                                                                                                                                                                    |                |        |                |        |                |        |                |        |
|------------------------------------------------------------------------------------------------------------------------------------------------------------------------------------------------------------------------------------------------------------------------------------------------------------------------------------------------------------------------------------------------------------------------------------|----------------|--------|----------------|--------|----------------|--------|----------------|--------|
| Period: Uncertain policy period                                                                                                                                                                                                                                                                                                                                                                                                    | -0.64 (0.58)   | 0.3    | N/A            |        | 0.10 (0.58)    | 0.9    | N/A            |        |
| Country                                                                                                                                                                                                                                                                                                                                                                                                                            | 3.31 (0.76)*** | <0.001 | N/A            |        | 3.96 (1.08)*** | <0.001 | N/A            |        |
| Country*Uncertain policy period                                                                                                                                                                                                                                                                                                                                                                                                    | 0.62 (1.37)    | 0.6    | N/A            |        | -0.72 (1.36)   | 0.6    | N/A            |        |
| <b>Little to No</b>                                                                                                                                                                                                                                                                                                                                                                                                                |                |        |                |        |                |        |                |        |
| Period: Uncertain policy period                                                                                                                                                                                                                                                                                                                                                                                                    | N/A            |        | -0.35 (0.39)   | 0.4    | -0.28 (0.36)   | 0.4    | -0.21 (0.34)   | 0.5    |
| Country                                                                                                                                                                                                                                                                                                                                                                                                                            | N/A            |        | 1.81 (0.32)*** | <0.001 | 2.37 (0.45)*** | <0.001 | 1.90 (0.38)*** | <0.001 |
| Country*Uncertain policy period                                                                                                                                                                                                                                                                                                                                                                                                    | N/A            |        | -0.33 (0.57)   | 0.6    | 1.27 (0.71)*   | 0.08   | -0.35 (0.52)   | 0.5    |
| <b>Missing rating</b>                                                                                                                                                                                                                                                                                                                                                                                                              |                |        |                |        |                |        |                |        |
| Period: Uncertain policy period                                                                                                                                                                                                                                                                                                                                                                                                    | N/A            |        | N/A            |        | N/A            |        | N/A            |        |
| Country                                                                                                                                                                                                                                                                                                                                                                                                                            | N/A            |        | N/A            |        | N/A            |        | N/A            |        |
| Country*Uncertain policy period                                                                                                                                                                                                                                                                                                                                                                                                    | N/A            |        | N/A            |        | N/A            |        | N/A            |        |
| Coefficients (standard error) estimated from generalized estimating equation logistic regression adjusted for the 1 <sup>st</sup> level of Anatomical Therapeutic Chemical, number of comparators in Canada, high price and first year sales in the US; US: the United States; N/A: regressions could not be estimated due to small samples and sparseness; *:0.05 ≤ p-value < 0.1, **:0.01 ≤ p-value < 0.05, ***: p-value < 0.01. |                |        |                |        |                |        |                |        |

**Table S9. Sensitivity analysis: number and proportion of new molecules launched within two years of their global first launch by country, policy period and therapeutic benefit**

| Therapeutic Benefit Rating <sup>a</sup> | Before uncertain period in 2012-2017 (N=242) |             |             |                 | Uncertain period after 2017 (N=107) |            |             |                 | P value: US vs. Canada <sup>b</sup> | P value: Other countries vs. Canada <sup>b</sup> |
|-----------------------------------------|----------------------------------------------|-------------|-------------|-----------------|-------------------------------------|------------|-------------|-----------------|-------------------------------------|--------------------------------------------------|
|                                         | Total                                        | Canada      | US          | Other countries | Total                               | Canada     | US          | Other countries |                                     |                                                  |
| Overall                                 | 242                                          | 109 (45.0%) | 197 (81.4%) | 203 (83.9%)     | 107                                 | 33 (30.8%) | 88 (82.2%)  | 75 (70.1%)      | 0.08                                | 0.4                                              |
| Major                                   | 34                                           | 12 (35.3%)  | 31 (91.2%)  | 27 (79.4%)      | 20                                  | 5 (25%)    | 19 (95%)    | 12 (60%)        | 0.3                                 | 0.7                                              |
| Moderate                                | 57                                           | 34 (59.6%)  | 54 (94.7%)  | 46 (80.7%)      | 24                                  | 8 (33.3%)  | 22 (91.7%)  | 14 (58.3%)      | 0.6                                 | N/A                                              |
| Little to No                            | 117                                          | 63 (53.8%)  | 105 (89.7%) | 99 (84.6%)      | 44                                  | 20 (45.5%) | 44 (100%)   | 33 (75%)        | N/A                                 | 0.6                                              |
| Missing rating                          | 34                                           | 0 (0%)      | 7 (20.6%)   | 31 (91.2%)      | 19                                  | 0 (0%)     | 3 (15.8%)   | 16 (84.2%)      | N/A                                 | N/A                                              |
|                                         | Before uncertain period in 2012-2015 (N=162) |             |             |                 | Uncertain period after 2015 (N=187) |            |             |                 |                                     |                                                  |
| Overall                                 | 162                                          | 72 (44.4%)  | 131 (80.9%) | 140 (86.4%)     | 187                                 | 70 (37.4%) | 154 (82.4%) | 138 (73.8%)     | 0.2                                 | 0.09                                             |
| Major                                   | 18                                           | 7 (38.9%)   | 17 (94.4%)  | 16 (88.9%)      | 36                                  | 10 (27.8%) | 33 (91.7%)  | 23 (63.9%)      | 0.6                                 | 0.3                                              |
| Moderate                                | 44                                           | 24 (54.5%)  | 42 (95.5%)  | 35 (79.5%)      | 37                                  | 18 (48.6%) | 34 (91.9%)  | 25 (67.6%)      | 0.6                                 | N/A                                              |
| Little to No                            | 77                                           | 41 (53.2%)  | 69 (89.6%)  | 66 (85.7%)      | 84                                  | 42 (50%)   | 80 (95.2%)  | 66 (78.6%)      | 0.08                                | 0.5                                              |
| Missing rating                          | 23                                           | 0 (0%)      | 3 (13%)     | 23 (100%)       | 30                                  | 0 (0%)     | 7 (23.3%)   | 24 (80%)        | N/A                                 | N/A                                              |

<sup>a</sup>first based on the highest rating from the Patented Medicine Prices Review Board, the Institute for Quality and Efficiency in Health Care in Germany, and the independent French medicine bulletin Prescrire International, then the breakthrough therapy designation by the Center for Drug Evaluation and Research (CDER) of US Food and Drug Administration (FDA), and then the first-in-class and priority review designation by FDA CDER.

<sup>b</sup>p value for the coefficient of the interaction term in the generalized estimating equation logistic regression, including uncertain period, comparison country, and interaction between uncertain period and comparison country, adjusted for the 1st level of Anatomical Therapeutic Chemical, number of comparators in Canada, high price, and first year sales in the US.

N/A: regressions could not be estimated due to small samples and sparseness.

US: the United States

**Table S10. Result summary by uncertain period, comparison country, and analysis method at a significance level of 0.1**

| Analysis                                                    | After 2017<br>as the uncertain period |                    |                                                                                                                                                                                                                                                            | After 2015<br>as the uncertain period |                         |
|-------------------------------------------------------------|---------------------------------------|--------------------|------------------------------------------------------------------------------------------------------------------------------------------------------------------------------------------------------------------------------------------------------------|---------------------------------------|-------------------------|
|                                                             | US                                    | Other<br>Countries | Individual Country                                                                                                                                                                                                                                         | US                                    | Other<br>Countries      |
| <b>Interrupted Time Series: two-year launch<sup>a</sup></b> | No                                    | No                 | -                                                                                                                                                                                                                                                          | No                                    | No                      |
| <b>GEE Logistic Regression: two-year launch<sup>b</sup></b> | Fewer launches in Canada              | No                 | <ul style="list-style-type: none"> <li>• Fewer launches than France</li> <li>• More launches than the Netherlands, Norway and Sweden</li> <li>• No detectable difference from Australia, Belgium, Germany, Italy, Japan, Spain, Switzerland, UK</li> </ul> | No                                    | More launches in Canada |
| <b>Sub-groups: two-year Launch<sup>b</sup></b>              |                                       |                    |                                                                                                                                                                                                                                                            |                                       |                         |
| ATC: Blood and blood forming organs                         | N/A                                   | No                 | -                                                                                                                                                                                                                                                          | N/A                                   | N/A                     |
| ATC: Anti-infectives for systemic use                       | No                                    | No                 | -                                                                                                                                                                                                                                                          | No                                    | No                      |
| ATC: Antineoplastic and immunomodulating agents             | No                                    | No                 | -                                                                                                                                                                                                                                                          | No                                    | No                      |
| ATC: nervous system                                         | No                                    | No                 | -                                                                                                                                                                                                                                                          | Fewer launches in Canada              | No                      |
| Other ATC                                                   | No                                    | No                 | -                                                                                                                                                                                                                                                          | No                                    | No                      |
| Number of comparators: 0                                    | No                                    | No                 | -                                                                                                                                                                                                                                                          | No                                    | No                      |
| Number of comparators: 1-4                                  | No                                    | No                 | -                                                                                                                                                                                                                                                          | Fewer launches in Canada              | No                      |
| Number of comparators: >4                                   | Fewer launches in Canada              | No                 | -                                                                                                                                                                                                                                                          | No                                    | No                      |
| High price in the top 10%                                   | No                                    | No                 | -                                                                                                                                                                                                                                                          | No                                    | No                      |
| Price not in the top 10%                                    | Fewer launches in Canada              | No                 | -                                                                                                                                                                                                                                                          | No                                    | More launches in Canada |
| First-year sales in US >\$20M                               | No                                    | No                 | -                                                                                                                                                                                                                                                          | No                                    | More launches in Canada |
| First-year sales in US ≤\$20M                               | No                                    | No                 | -                                                                                                                                                                                                                                                          | Fewer launches in Canada              | No                      |

|                                                                                                                                                                                                                                                                                                                                                                                                                                                                                                                                                                                                                                                                                                                                                                                                                                                                                                                                                                                                                                                                                                                                        |     |     |   |                          |     |
|----------------------------------------------------------------------------------------------------------------------------------------------------------------------------------------------------------------------------------------------------------------------------------------------------------------------------------------------------------------------------------------------------------------------------------------------------------------------------------------------------------------------------------------------------------------------------------------------------------------------------------------------------------------------------------------------------------------------------------------------------------------------------------------------------------------------------------------------------------------------------------------------------------------------------------------------------------------------------------------------------------------------------------------------------------------------------------------------------------------------------------------|-----|-----|---|--------------------------|-----|
| Major therapeutic benefit                                                                                                                                                                                                                                                                                                                                                                                                                                                                                                                                                                                                                                                                                                                                                                                                                                                                                                                                                                                                                                                                                                              | N/A | No  | - | Fewer launches in Canada | N/A |
| Moderate therapeutic benefit                                                                                                                                                                                                                                                                                                                                                                                                                                                                                                                                                                                                                                                                                                                                                                                                                                                                                                                                                                                                                                                                                                           | N/A | N/A | - | N/A                      | N/A |
| Little to no therapeutic benefit                                                                                                                                                                                                                                                                                                                                                                                                                                                                                                                                                                                                                                                                                                                                                                                                                                                                                                                                                                                                                                                                                                       | N/A | No  | - | No                       | No  |
| <b>Imputed Therapeutic Benefit Rating<sup>c</sup></b>                                                                                                                                                                                                                                                                                                                                                                                                                                                                                                                                                                                                                                                                                                                                                                                                                                                                                                                                                                                                                                                                                  |     |     | - |                          |     |
| Major therapeutic benefit                                                                                                                                                                                                                                                                                                                                                                                                                                                                                                                                                                                                                                                                                                                                                                                                                                                                                                                                                                                                                                                                                                              | No  | No  | - | No                       | No  |
| Moderate therapeutic benefit                                                                                                                                                                                                                                                                                                                                                                                                                                                                                                                                                                                                                                                                                                                                                                                                                                                                                                                                                                                                                                                                                                           | No  | N/A | - | No                       | N/A |
| Little to no therapeutic benefit                                                                                                                                                                                                                                                                                                                                                                                                                                                                                                                                                                                                                                                                                                                                                                                                                                                                                                                                                                                                                                                                                                       | N/A | No  | - | Fewer launches in Canada | No  |
| <b>GEE Logistic Regression: one-year launch<sup>b</sup></b>                                                                                                                                                                                                                                                                                                                                                                                                                                                                                                                                                                                                                                                                                                                                                                                                                                                                                                                                                                                                                                                                            | No  | No  | - | No                       | No  |
| <p>US: the United States; UK: the United Kingdom; GEE logistic regression: generalized estimating equation logistic regression adjusted for the 1<sup>st</sup> level of Anatomical Therapeutic Chemical, number of comparators in Canada, high price, and first year sales in the US; ATC: Anatomical Therapeutic Chemical</p> <p>No: no detectable difference</p> <p><sup>a</sup>based on the 90% confidence interval of the difference between expected absolute changes over policy periods in Canada and the comparison country;</p> <p><sup>b</sup>based on p value &lt;0.1 for the coefficient of the interaction term of comparison country and uncertain period in the GEE logistic regression; fewer launches: the decrease of the log odds of launching in Canada was larger; more launches: the decrease of the log odds of launching in Canada was smaller;</p> <p><sup>c</sup>further imputed by the designation of first-in-class and priority review by US Food and Drug Administration</p> <p>-: the analysis was not conducted</p> <p>N/A: regressions could not be estimated due to small samples and sparseness</p> |     |     |   |                          |     |
